# Supplementary material for: Adoption of Pedagogical Innovations: Social Networks of Engineering Education Guilds
Source: MDPI journal article supplement (doi:10.3390/educsci13111102), 2023-11-01
Supplement: s1 [file s1]

English

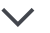

## SURVEY INSTRUCTION

### Informed Consent

You are invited to participate in this online research survey entitled Faculty Resource Network Usage. You are included in this survey because you have either had primary experience with one of the engineering education guilds of interest or have interacted with someone who has had primary experience with one of the guilds of interest. The number of subjects to be enrolled in the study will be dependent on the number of survey responses we receive.

The survey may take approximately 15-30 minutes to complete. Your participation is voluntary. If you do not wish to participate in this survey, do not respond to this online survey. Completing this survey indicates that you are voluntarily giving consent to participate in the survey.

The purpose of this research study is to determine how faculty use available resources, including engineering education "guilds" to make changes to their pedagogical practices.

There are no risks or discomforts associated with this survey. **There may be no direct benefit to you, however,** by participating in this study, you may help us understand what resources faculty use when preparing to teach how faculty make changes to their teaching practice.

The information you share in your response will be protected and made confidential for publication. **Your name, as well as the names of any colleagues you may identify, will be collected for the purposes of building a social network analysis. Your data will be de-identified during this process. We will store the data in a secure computer file and the file will be destroyed once the data has been published.** Any part of the research that is published as part of this study will not include your individual information. If you have any questions about the survey, you can contact the PI, Kaitlin Mallouk at mallouk@rowan.edu or

at Rowan University, 201 Mullica Hill Rd, Glassboro, NJ 08028, but you do not have to give your personal identification.

If you have any questions about your rights as a research subject, please contact the Office of Research Compliance at (856) 256-4078– Glassboro/CMSRU.

This study has been approved by the Rowan IRB, PRO-2020-61.

Please complete the checkbox below.

To participate in this survey, you must be 18 years or older and have taught at a College or University.

- ☐ I consent, begin the study
- ☐ I do not consent, I do not wish to participate

### Demographic Information

What is your name?

What is your institutional email address?

What institution do you primarily teach at?

How many years have you been teaching / did you teach?

- ☐ Less than 1
- ☐ 1-2
- ☐ 2-5
- ☐ 5-10

☐ 10+

What discipline(s) do/did you teach?

|                        | Do/did you teach in this discipline? |                       | What course level do/did you teach? |                          |                          |                          |                          |
|------------------------|--------------------------------------|-----------------------|-------------------------------------|--------------------------|--------------------------|--------------------------|--------------------------|
|                        | Yes                                  | No                    | First year (100)                    | Second year (200)        | Third year (300)         | Fourth year (400)        | Grad level (500+)        |
| General Engineering    | <input type="radio"/>                | <input type="radio"/> | <input type="checkbox"/>            | <input type="checkbox"/> | <input type="checkbox"/> | <input type="checkbox"/> | <input type="checkbox"/> |
| Biomedical Engineering | <input type="radio"/>                | <input type="radio"/> | <input type="checkbox"/>            | <input type="checkbox"/> | <input type="checkbox"/> | <input type="checkbox"/> | <input type="checkbox"/> |
| Chemical Engineering   | <input type="radio"/>                | <input type="radio"/> | <input type="checkbox"/>            | <input type="checkbox"/> | <input type="checkbox"/> | <input type="checkbox"/> | <input type="checkbox"/> |
| Civil Engineering      | <input type="radio"/>                | <input type="radio"/> | <input type="checkbox"/>            | <input type="checkbox"/> | <input type="checkbox"/> | <input type="checkbox"/> | <input type="checkbox"/> |
| Electrical Engineering | <input type="radio"/>                | <input type="radio"/> | <input type="checkbox"/>            | <input type="checkbox"/> | <input type="checkbox"/> | <input type="checkbox"/> | <input type="checkbox"/> |
| Mechanical Engineering | <input type="radio"/>                | <input type="radio"/> | <input type="checkbox"/>            | <input type="checkbox"/> | <input type="checkbox"/> | <input type="checkbox"/> | <input type="checkbox"/> |
| Interdisciplinary      | <input type="radio"/>                | <input type="radio"/> | <input type="checkbox"/>            | <input type="checkbox"/> | <input type="checkbox"/> | <input type="checkbox"/> | <input type="checkbox"/> |
| Other                  | <input type="radio"/>                | <input type="radio"/> | <input type="checkbox"/>            | <input type="checkbox"/> | <input type="checkbox"/> | <input type="checkbox"/> | <input type="checkbox"/> |

If you selected 'other', please describe what discipline you teach/taught:

What is your level of involvement with the Kern Entrepreneurial Engineering Network (KEEN)?

- ☐ Primary (I am a KEEN / Engineering Unleashed member, I have attended KEEN-related events/workshops, I have developed materials for KEEN, or I have otherwise had direct interaction with KEEN and its materials)
- ☐ Secondary (I work with people involved with KEEN, I have been given KEEN-related materials for classroom use, I have a mentor involved with KEEN, or I have otherwise had indirect interaction with KEEN)
- ☐ No involvement (to my knowledge, I have never used KEEN materials or interacted with a KEEN member)

## Reflection in Engineering Education

How often do/did you make use of assignments relating to the development of Entrepreneurial Mindset (EM) in your classroom(s)?

- ☐ Never
- ☐ Rarely
- ☐ Sometimes
- ☐ Often
- ☐ Constantly and consistently

How did you learn about EM in engineering education? Select all that apply.

- ☐ Materials through the Consortium to Promote Reflection in Engineering Education (CPREE). Clarify the specific interaction (website, face to face with one of the organizers, etc)
- ☐ Materials through the Kern Entrepreneurial Engineering Network (KEEN). Clarify the specific interaction (engineeringunleashed.com, face to face with one of the organizers, etc)
- ☐ A workshop through my institution
- ☐ A workshop at a national/international conference (please specify the host organization)
- ☐ A workshop through a local/regional conference (please specify the host organization)
- ☐ A workshop through the Center for the Integration of Research, Teaching and Learning (CIRTL)
- ☐ A journal article
- ☐ An education-related textbook
- ☐ A conference presentation (please specify the host organization)
- ☐ A colleague at your institution
- ☐ A colleague at a different institution
- ☐ A mentor at your institution
- ☐ A mentor at a different institution
- ☐ Other

How do/did you apply EM in your engineering classroom(s)? What does a typical EM-building

activity look like in your class, and when do you utilize such activities?

What is/was your motivation for using EM-building activities in your engineering classroom(s)?  
What made you decide to emphasize students' EM?

What resources did you use to support your integration of EM-building activities in your classroom? Select all that apply.

- ☐ Materials through the Consortium to Promote Reflection in Engineering Education (CPREE). Clarify the specific interaction (website, face to face with one of the organizers, etc)
- ☐ Materials through the Kern Entrepreneurial Engineering Network (KEEN). Clarify the specific interaction (website, face to face with one of the organizers, etc)
- ☐ A workshop through my institution
- ☐ A workshop at a national/international conference (please specify the host organization)
- ☐ A workshop through a local/regional conference (please specify the host organization)
- ☐ A workshop through the Center for the Integration of Research, Teaching and Learning (CIRTL)
- ☐ A journal article
- ☐ An education-related textbook
- ☐ A conference presentation (please specify the host organization)
- ☐ A colleague at your institution
- ☐ A colleague at a different institution
- ☐ A mentor at your institution
- ☐ A mentor at a different institution

☐ Other

Of the resources listed above, which was the most influential in helping you build EM your classroom(s)?

What was your process for integrating EM-building activities into your classroom(s)?

What advice do you have for others integrating EM-building activities to their classroom(s)?

## Propagation

We are interested in how pedagogical innovations are shared and propagated in the community. Have you discussed or learned about the use of EM-building activities in engineering education with any colleagues (at your institution or elsewhere)?

- ☐ Yes, and I am comfortable sharing their contact information
- ☐ Yes, but I am not comfortable sharing their contact information
- ☐ No

We would appreciate the name and contact information of anyone with whom you have discussed/learned about EM in engineering education

|               | Name of Colleague (first and last) | Institutional Affiliation | Email address        | How did you discuss?     |                          |                                        |                          | If other, please explain:                                             |
|---------------|------------------------------------|---------------------------|----------------------|--------------------------|--------------------------|----------------------------------------|--------------------------|-----------------------------------------------------------------------|
|               | Name of Colleague (first and last) | Institutional Affiliation | Email Address        | They taught me about EM  | I taught them about EM   | We collaborated on EM-related pedagogy | Other                    | If other, please explain: How did you discuss EM with this colleague? |
| Colleague #1  | <input type="text"/>               | <input type="text"/>      | <input type="text"/> | <input type="checkbox"/> | <input type="checkbox"/> | <input type="checkbox"/>               | <input type="checkbox"/> | <input type="text"/>                                                  |
| Colleague #2  | <input type="text"/>               | <input type="text"/>      | <input type="text"/> | <input type="checkbox"/> | <input type="checkbox"/> | <input type="checkbox"/>               | <input type="checkbox"/> | <input type="text"/>                                                  |
| Colleague #3  | <input type="text"/>               | <input type="text"/>      | <input type="text"/> | <input type="checkbox"/> | <input type="checkbox"/> | <input type="checkbox"/>               | <input type="checkbox"/> | <input type="text"/>                                                  |
| Colleague #4  | <input type="text"/>               | <input type="text"/>      | <input type="text"/> | <input type="checkbox"/> | <input type="checkbox"/> | <input type="checkbox"/>               | <input type="checkbox"/> | <input type="text"/>                                                  |
| Colleague #5  | <input type="text"/>               | <input type="text"/>      | <input type="text"/> | <input type="checkbox"/> | <input type="checkbox"/> | <input type="checkbox"/>               | <input type="checkbox"/> | <input type="text"/>                                                  |
| Colleague #6  | <input type="text"/>               | <input type="text"/>      | <input type="text"/> | <input type="checkbox"/> | <input type="checkbox"/> | <input type="checkbox"/>               | <input type="checkbox"/> | <input type="text"/>                                                  |
| Colleague #7  | <input type="text"/>               | <input type="text"/>      | <input type="text"/> | <input type="checkbox"/> | <input type="checkbox"/> | <input type="checkbox"/>               | <input type="checkbox"/> | <input type="text"/>                                                  |
| Colleague #8  | <input type="text"/>               | <input type="text"/>      | <input type="text"/> | <input type="checkbox"/> | <input type="checkbox"/> | <input type="checkbox"/>               | <input type="checkbox"/> | <input type="text"/>                                                  |
| Colleague #9  | <input type="text"/>               | <input type="text"/>      | <input type="text"/> | <input type="checkbox"/> | <input type="checkbox"/> | <input type="checkbox"/>               | <input type="checkbox"/> | <input type="text"/>                                                  |
| Colleague #10 | <input type="text"/>               | <input type="text"/>      | <input type="text"/> | <input type="checkbox"/> | <input type="checkbox"/> | <input type="checkbox"/>               | <input type="checkbox"/> | <input type="text"/>                                                  |

Would you be willing to participate in a follow-up interview regarding your survey responses?

☐ Yes

☐ No

## Block 5

What additional comments you would like to share with us?

Powered by Qualtrics
