# Supplementary material for: Adoption of Pedagogical Innovations: Social Networks of Engineering Education Guilds
Source: MDPI journal article supplement (doi:10.3390/educsci13111102), 2023-11-01
Supplement: s1 [file s1]

Archive with 1 entries (1 files):
- education-2647299-supplementary.pdf
